# Supplementary material
Source: MDPI journal article supplement (https://www.mdpi.com/2311-5637/9/4/316)
Supplement: s1 [file s1]

**Table S1.** Nutritional composition of RY4.

| Items        | RY4  |
|--------------|------|
| DM (% , FM)  | 17.4 |
| CP (% , DM)  | 10.3 |
| EE (% , DM)  | 2.4  |
| NDF (% , DM) | 58.8 |
| ADF (% , DM) | 35.6 |
| Ash (% , DM) | 12.8 |

FM, Fresh weight;DM, Dry weight.

**Table S2.** Principal Factor Loading Matrix

| Index                                 | Factor loading |        |
|---------------------------------------|----------------|--------|
|                                       | F1             | F2     |
| SDW (x <sub>1</sub> )                 | 0.901          | -0.12  |
| RDW (x <sub>2</sub> )                 | 0.605          | -0.362 |
| NDW (x <sub>3</sub> )                 | 0.559          | -0.565 |
| NON (x <sub>4</sub> )                 | 0.837          | -0.265 |
| CP (x <sub>5</sub> )                  | 0.838          | -0.022 |
| PP (x <sub>6</sub> )                  | 0.937          | -0.127 |
| EE (x <sub>7</sub> )                  | 0.558          | 0.61   |
| NDF (x <sub>8</sub> )                 | -0.547         | 0.234  |
| ADF (x <sub>9</sub> )                 | 0.124          | 0.528  |
| Ash (x <sub>10</sub> )                | -0.364         | -0.179 |
| IVDMD (x <sub>11</sub> )              | -0.437         | -0.401 |
| NH <sub>3</sub> -N (x <sub>12</sub> ) | 0.576          | 0.257  |
| MCP (x <sub>13</sub> )                | 0.461          | 0.001  |
| Acetate (x <sub>14</sub> )            | 0.18           | 0.762  |
| Propionate (x <sub>15</sub> )         | 0.022          | 0.826  |
| TVFA (x <sub>16</sub> )               | 0.305          | 0.595  |

**Principal component scoring equation:**

$$Y_1 = 0.388X_1 + 0.261X_2 + 0.241X_3 + 0.360X_4 + 0.361X_5 + 0.404X_6 + 0.240X_7 - 0.236X_8 + 0.053X_9 - 0.157X_{10} - 0.188X_{11} + 0.248X_{12} + 0.199X_{13} + 0.078X_{14} + 0.009X_{15} + 0.131X_{16}$$

$$Y_2 = -0.068X_1 - 0.205X_2 - 0.319X_3 - 0.150X_4 - 0.012X_5 - 0.072X_6 + 0.345X_7 + 0.132X_8 + 0.298X_9 - 0.101X_{10} - 0.227X_{11} + 0.145X_{12} + 0.001X_{13} + 0.431X_{14} + 0.467X_{15} + 0.336X_{16}$$

$$Y_3 = 0.337 Y_1 + 0.196 Y_2$$

**Table s3.** *In vitro* fermentation gas production (ml/g).

|          | 2h           | 4h         | 8h           | 12h        | 24h          | 36h        | 48h         | 72h         |
|----------|--------------|------------|--------------|------------|--------------|------------|-------------|-------------|
| RY4      | 19.3 ± 3.0a  | 22.7 ± 3.1 | 27.6 ± 2.5a  | 34.2 ± 2.5 | 44.2 ± 1.9ab | 70.7 ± 5.2 | 94.9 ± 5.6a | 108.7 ± 6.0 |
| CK + RY4 | 13.0 ± 1.3b  | 16.2 ± 1.4 | 20.4 ± 1.8b  | 27.9 ± 2.1 | 40.1 ± 2.8b  | 71.2 ± 4.4 | 86.3 ± 3.4a | 97.9 ± 3.3  |
| R1 + RY4 | 15.8 ± 1.1ab | 19.3 ± 1.2 | 23.0 ± 1.3ab | 30.9 ± 1.3 | 43.6 ± 1.1ab | 74.4 ± 3.0 | 89.8 ± 2.6a | 102.0 ± 2.6 |
| R2 + RY4 | 15.2 ± 1.6ab | 18.1 ± 2.8 | 23.1 ± 2.8ab | 29.4 ± 2.9 | 42.2 ± 3.0ab | 72.0 ± 2.8 | 81.9 ± 2.6a | 93.6 ± 3.0  |
| R3 + RY4 | 17.7 ± 0.9ab | 21.7 ± 1.3 | 26.2 ± 0.7ab | 32.8 ± 0.8 | 45.1 ± 1.3ab | 70.9 ± 2.5 | 85.0 ± 1.6a | 96.6 ± 1.5  |

|          |              |            |              |            |              |             |              |              |
|----------|--------------|------------|--------------|------------|--------------|-------------|--------------|--------------|
| R4 + RY4 | 16.3 ± 1.6ab | 20.1 ± 1.4 | 26.2 ± 1.4ab | 32.9 ± 1.5 | 50.9 ± 4.8a  | 79.1 ± 10.6 | 90.2 ± 11.2a | 102.5 ± 11.4 |
| R5 + RY4 | 17.2 ± 2.4ab | 21.1 ± 2.1 | 25.6 ± 1.6ab | 32.3 ± 1.6 | 49.4 ± 3.0ab | 77.6 ± 3.9  | 89.0 ± 4.8a  | 100.2 ± 5.4  |
| R6 + RY4 | 14.9 ± 0.8ab | 19.7 ± 1.6 | 26.0 ± 1.7ab | 32.6 ± 1.6 | 47.2 ± 3.8ab | 73.4 ± 3.8  | 84.4 ± 3.9a  | 95.7 ± 4.2   |

---

Different superscript letters of data in the same row indicate significant differences between different treatments ( $p < 0.05$ ).
